# Supplementary material for: Long chain n-3 polyunsaturated fatty acids and incidence rate of coronary artery calcification in Japanese men in Japan and white men in the USA: population based prospective cohort study
Source: HighWire-hosted journal article supplement (doi:10.1136/heartjnl-2013-304421), 2013-12-18
Supplement: heartjnl-2013-304421supp_tables.pdf [file heartjnl-2013-304421supp_tables.pdf]

**Online Table 1 A.** Characteristics of participants and non-participants of the follow-up study with zero coronary calcium score at baseline in Japanese

|                                      | Participants<br>(n=255) | Non-participants<br>(n=58) | p      |
|--------------------------------------|-------------------------|----------------------------|--------|
| Age (years)                          | 45.1 (2.8)              | 45.0 (2.8)                 | 0.880  |
| Body-mass index (kg/m <sup>2</sup> ) | 23.8 (3.1)              | 23.4 (2.9)                 | 0.405  |
| Systolic blood pressure (mmHg)       | 125.2 (16.2)            | 123.9 (15.4)               | 0.580  |
| Medication for hypertension (%)      | 5.5                     | 5.1                        | >0.999 |
| LDL-C (mmol/L)                       | 3.42 (0.93)             | 3.43 (0.96)                | 0.981  |
| HDL-C (mmol/L)                       | 1.39 (0.35)             | 1.45 (0.35)                | 0.295  |
| Triglycerides (mmol/L)               | 1.56 (1.16, 2.06)       | 1.51 (1.09, 2.07)          | 0.778  |
| Medication for hyperlipidemia (%)    | 3.1                     | 5.2                        | 0.715  |
| Glucose (mmol/L)                     | 5.92 (0.99)             | 5.94 (1.22)                | 0.906  |
| Diabetes (%)                         | 6.7                     | 3.4                        | 0.534  |
| C-reactive protein (mg/L)            | 0.30 (0.15, 0.66)       | 0.35 (0.17, 0.74)          | 0.460  |
| Smoking                              |                         |                            |        |
| Current (%)                          | 49.4                    | 48.3                       | 0.991  |
| Former (%)                           | 32.9                    | 36.2                       | 0.748  |
| Pack years                           | 18.0 (3.0, 29.0)        | 21.9 (8.3, 30.4)           | 0.357  |
| Alcohol                              |                         |                            |        |
| Drinker (≥2 day/week)                | 67.5                    | 65.5                       | 0.898  |
| Ethanol consumption (g/day)          | 14.0 (2.6, 42.0)        | 20.0 (1.8, 56.0)           | 0.530  |
| Total marine n-3 fatty acids (%)     | 9.25 (2.79)             | 9.39 (3.62)                | 0.786  |
| Eicosapentaenoic acids (EPA) (%)     | 2.50 (1.35)             | 2.61 (1.71)                | 0.775  |
| Docosahexaenoic acids (DHA) (%)      | 5.90 (1.56)             | 5.98 (2.03)                | 0.645  |
| Coronary calcium score               | 0.0 (0.0, 1.5)          | 0.0 (0.0, 1.9)             | 0.766  |
| Rate of coronary calcification (%)   | 11.7                    | 13.8                       | 0.721  |

Values are expressed as mean (standard deviation) or median (25<sup>th</sup> and 75<sup>th</sup> percentile) for continuous variables and % for categorical variables.

LDL-C: low density lipoprotein cholesterol, HDL-C: high density lipoprotein cholesterol,

Total marine n-3 fatty acids were defined as the sum of eicosapentaenoic, docosapentaenoic, and docosahexaenoic acids.

**Online Table 1 B.** Characteristics of participants and non-participants of the follow-up study with zero coronary calcium score at baseline in whites

|                                      | Participants<br>(n=245) | Non-participants<br>(n=65) | p      |
|--------------------------------------|-------------------------|----------------------------|--------|
| Age (years)                          | 44.9 (2.7)              | 44.9 (2.8)                 | 0.819  |
| Body-mass index (kg/m <sup>2</sup> ) | 27.8 (4.0)              | 28.5 (5.7)                 | 0.378  |
| Systolic blood pressure (mmHg)       | 122.6 (10.9)            | 122.4 (12.3)               | 0.890  |
| Medication for hypertension (%)      | 8.2                     | 10.8                       | 0.678  |
| LDL-C (mmol/L)                       | 3.42 (0.93)             | 3.43 (0.96)                | 0.519  |
| HDL-C (mmol/L)                       | 1.39 (0.35)             | 1.45 (0.35)                | 0.111  |
| Triglycerides (mmol/L)               | 1.47 (1.07, 2.10)       | 1.33 (1.00, 1.90)          | 0.164  |
| Medication for hyperlipidemia (%)    | 13.1                    | 9.2                        | 0.532  |
| Glucose (mmol/L)                     | 5.62 (0.80)             | 5.73 (1.01)                | 0.368  |
| Diabetes (%)                         | 3.7                     | 3.1                        | >0.999 |
| C-reactive protein (mg/L)            | 1.00 (0.54, 1.87)       | 0.84 (0.35, 1.50)          | 0.067  |
| Smoking                              | 3.7                     | 3.1                        |        |
| Current (%)                          | 6.9                     | 10.8                       | 0.444  |
| Former (%)                           | 18.4                    | 23.1                       | 0.498  |
| Pack years                           | 0.0 (0.0, 0.5)          | 0.0 (0.0, 4.9)             | 0.245  |
| Alcohol                              |                         |                            |        |
| Drinker (≥2 day/week)                | 44.9                    | 41.5                       | 0.731  |
| Ethanol consumption (g/day)          | 4.9 (0.9, 16.5)         | 4.3 (1.0, 14.9)            | 0.549  |
| Total marine n-3 fatty acids (%)     | 3.78 (1.70)             | 4.13 (1.87)                | 0.368  |
| Eicosapentaenoic acids (EPA)<br>(%)  | 0.80 (0.60)             | 0.79 (0.45)                | 0.970  |
| Docosahexaenoic acids (DHA)<br>(%)   | 2.33 (1.24)             | 2.52 (1.14)                | 0.295  |
| Coronary calcium score               | 1.4 (0.0, 12.5)         | 0.0 (0.0, 10.3)            | 0.107  |
| Rate of coronary calcification (%)   | 26.5                    | 25.4                       | 0.983  |

Values are expressed as mean (standard deviation) or median (25<sup>th</sup> and 75<sup>th</sup> percentile) for continuous variables and % for categorical variables.

LDL-C: low density lipoprotein cholesterol, HDL-C: high density lipoprotein cholesterol,

Total marine n-3 fatty acids were defined as the sum of eicosapentaenoic, docosapentaenoic, and docosahexaenoic acids.

**Online Table 2** The number of individuals by coronary calcium score both at baseline and follow-up scans in each of Japanese and whites

| Japanese        |             | CCS at follow-up |           |             |       |       |
|-----------------|-------------|------------------|-----------|-------------|-------|-------|
|                 |             | 0                | 0 < & <10 | 10 ≤ & <100 | 100 ≤ | Total |
| CCS at baseline | 0           | 151              | 14        | 9           | 1     | 175   |
|                 | 0 < & <10   | 27               | 11        | 11          | 1     | 50    |
|                 | 10 ≤ & <100 | 3                | 0         | 12          | 8     | 23    |
|                 | 100 ≤       | 0                | 0         | 0           | 5     | 5     |
|                 | Total       | 181              | 25        | 32          | 15    | 253   |

  

| Whites          |             | CCS at follow-up |           |             |       |       |
|-----------------|-------------|------------------|-----------|-------------|-------|-------|
|                 |             | 0                | 0 < & <10 | 10 ≤ & <100 | 100 ≤ | Total |
| CCS at baseline | 0           | 72               | 26        | 14          | 1     | 113   |
|                 | 0 < & <10   | 19               | 29        | 16          | 3     | 67    |
|                 | 10 ≤ & <100 | 2                | 2         | 27          | 20    | 51    |
|                 | 100 ≤       | 0                | 0         | 0           | 12    | 12    |
|                 | Total       | 93               | 57        | 57          | 36    | 243   |

CCS: Coronary calcium score
